# Supplementary material
Source: PubMed Central journal article supplement (PMC8763600)
Supplement: NIHMS1756144-supplement-1.pdf [file NIHMS1756144-supplement-1.pdf]

## Supplementary Materials

### (1) Why do the conventional methods fail in the presence of correlated data?

In basic neuroscience research, data dependency due to clustering or repeated measurements is probably the norm rather than the exception. Unfortunately, the most widely used methods under these situations are still the t-test and ANOVA, which do not take dependence into account, thus leading to incorrect statistical inference and misleading conclusions.

We will use a data set collected from our own work to assess the degree of data dependency due to clustering (animal effects) and to illustrate the consequences of ignoring the dependent structure. In this example, we measured the change in pCREB immunoreactivity of 1,200 putative excitatory neurons in mouse visual cortex at different time points: collected at baseline (saline), 24, 48, 72 hours, and 1 week following ketamine treatment, from 24 mice. See Grieco et al. (2020) for more details. Figure S1 shows that the changes in pCREB immunoreactivity tend to be clustered, i.e., measurements from the same animal tend to be more similar to each other than measurements from different animals.

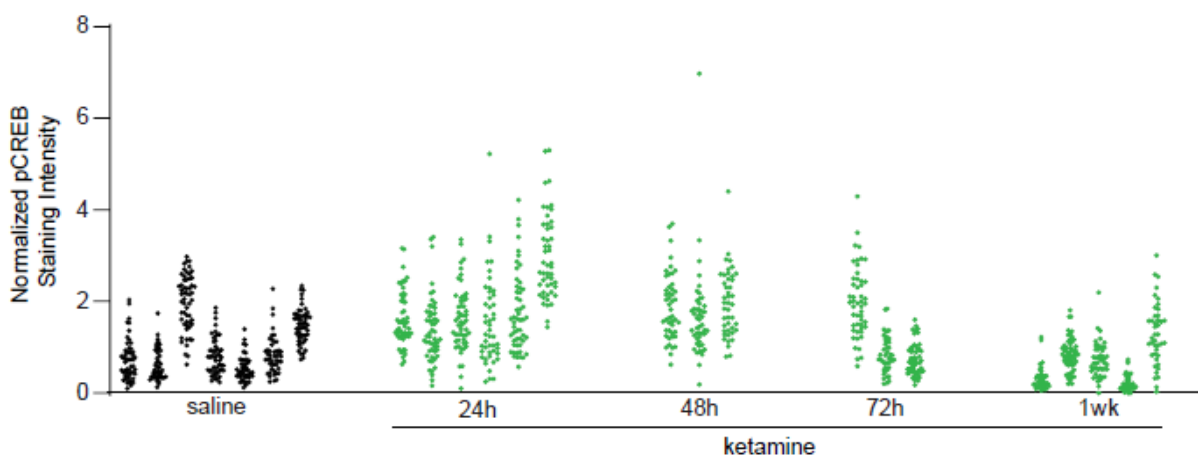

**Figure S1:** Normalized pCREB staining intensity values from 1,200 neurons (Example 1). The values in each cluster were from one animal. In total, pCREB values were measured for 1,200 neurons from 24 mice at five conditions: saline (7 mice), 24h (6 mice), 48h (3 mice), 72h (3 mice), 1week (5 mice) after treatment.

We compute the intra-class correlation (ICC) to quantify the magnitude of dependency within animals using the software R, a free and open source software ([CRAN](https://www.R-project.org/)) (R Development Core Team, 2020). One major advantage of R over other open source or commercial software is that R is widely adopted and continuously reassessed for accuracy, and has a rich collection of user-contributed packages (over 15,000), thus supporting a programming environment for developers and access to cutting-edge statistical methods. In this tutorial, we will use the following R packages: [lme4](https://cran.r-project.org/web/packages/lme4/index.html) (Bates et al., 2014), [nlme](https://cran.r-project.org/web/packages/nlme/index.html) (Pinheiro

26 et al., 2007), [icc](#) (Wolak and Wolak, 2015), [pbkrtest](#) (Halekoh and Højsgaard, 2014), [brms](#) (Bürkner, 2017;  
27 Bürkner, 2018), [lmerTest](#) (Kuznetsova et al., 2017), [emmeans](#) (Lenth et al., 2019), [car](#) (Fox and Weisberg,  
28 2018) , and [sjPlot](#) (Lüdecke, 2018). If they have not been installed onto your computer, you will need to  
29 install them by removing the “#” symbol and copy one line at a time to your R console. The “#” symbol is  
30 used for commenting out code in R. The installation of a package to a computer only needs to be done  
31 once. However, the libraries for data analysis need to be loaded each time you start the R software. We  
32 recommend you only load a library when it is needed.

```
#install.packages("lme4")
#install.packages("nlme")
#install.packages("ICC")
#install.packages("brms")
#install.packages("pbkrtest")
#install.packages("emmeans")
#install.packages("car")
#install.packages("sjPlot")
```

33  
34 We start with reading the pCREB data (Example 1) into R. Because the data file is comma-  
35 separated, we use the function “read.csv” to read it. The option “head=T” reads the first row as the  
36 column names. Most R packages of LME require the “long”, also known as “vertical” format, in which data  
37 are organized in a rectangular data matrix, i.e., each row of the dataset contains only the values for one  
38 observation. The columns contain necessary information about this observation such as the experimental  
39 condition, treatment, cell ID, and animal ID. In this example, the data are stored in a 1,200-by-3 matrix,  
40 with the first column being the pCREB immunoreactivity values, the second column being the treatment  
41 labels, and the last column being the animal identification numbers. The treatment information is in the  
42 second column and it is coded as labels 1 through 5: 1 for baseline (saline), 2-5 for 24, 48, 72 hours, and 1  
43 week after ketamine treatment, respectively. By default, the treatment information is read into numerical  
44 values. To convert it to a categorical variable, we apply the “as.factor” function to the treatment variable.

```
# The following lines of code read the Example 1 data
> Ex1 = read.csv("Example1.txt", head=T)

# checking the dimensions of the dataset
# in this case 1200 rows and 3 columns
> dim(Ex1)
[1] 1200 3

# checking the names of each column
> names(Ex1)
[1] "res" "treatment_idx" "midx"

# a frequency table for the treatment variable
> table(Ex1$treatment_idx)
 1  2  3  4  5
357 309 139 150 245

# a frequency table for the measurements in each mouse
```

```

> table(Ex1$midx)
 1  2  3  4  5  6  7  8  9 10 11 12 13 14 15 16 17 18 19 20 21 22 23 24
53 49 56 52 46 47 54 52 54 54 47 53 49 47 48 44 50 45 55 47 57 47 52 42

#Do not forget to factor the treatment IDs
Ex1$treatment_idx = as.factor(Ex1$treatment_idx)

```

45  
46           Next, we examine the magnitude of clustering due to animal effects by computing the ICC for  
47 each treatment group.

```

### load the ICC library
library(ICC) #load the library to conduct ICC analysis with its function ICCbare

### conduct ICC analysis by organizing all the information into a data frame
icc.analysis=data.frame(n=rep(0,5), icc=rep(0,5), design.effect=rep(0,5),
effective.n=rep(0,5), M=rep(0,5), cells=rep(0,5))
for(i in 1:5)
{
  trt= Ex1[Ex1$treatment_idx==i,]
  trt$midx=factor(trt$midx)
  icc=ICCbare(factor(trt$midx), trt$res) #ICCbare is a function in the ICC package
  icc.analysis$cells[i]=dim(trt)[1]
  M=dim(trt)[1]/length(unique( trt$midx))
  def=1+ icc*(M-1)

  icc.analysis$n[i]=length(unique( trt$midx))
  icc.analysis$icc[i]=icc
  icc.analysis$design.effect[i]=def
  icc.analysis$effective.n[i]=dim(trt)[1]/def
  icc.analysis$M[i]=M
}
> icc.analysis
  n      icc design.effect effective.n      M cells
1 7 0.62094868      32.047434  11.139737 51.00000 357
2 6 0.33006327      17.668195  17.489053 51.50000 309
3 3 0.01780304       1.807071  76.920039 46.33333 139
4 3 0.62810904      31.777343   4.720344 50.00000 150
5 5 0.53694579      26.773398   9.150874 49.00000 245

```

48  
49 The results are organized in the following table:

|            | Saline (7 mice) | 24h (6 mice) | 48h (3 mice) | 72h (3 mice) | 1wk (5 mice) |
|------------|-----------------|--------------|--------------|--------------|--------------|
| # of cells | 357             | 209          | 139          | 150          | 245          |
| ICC        | 0.61            | 0.33         | 0.02         | 0.63         | 0.54         |

50  
51           The ICC indicates that the dependency due to clustering is substantial. Therefore, the 1,200  
52 neurons should not be treated as 1,200 independent cells. When dependence is not adequately accounted  
53 for, the type I error rate can be much higher than the pre-chosen level of significance. To see how serious  
54 this problem is, we examine the false positives based on the dependence structure observed in our own  
55 study. In the simulation script we wrote (simulation\_TypeIErrorRate.R, see the Supplemental Appendix 0),  
56 we generated 1000 data sets, each of which follows the same ICC structure and assumes NO difference

57 between the five conditions. Surprisingly, the type I error rate when treating 1,200 neurons as  
58 independent observations is over 90% at the significance level of  $\alpha=0.05$ .

```
### run the simulation script
> source("simulation_TypeIErrorRate.R")
[1] "Type I error rate of LM at significance level 0.05: "
[1] 0.9
[1] "Type I error rate of LME at significance level 0.05: "
[1] 0.086
```

59  
60 This is a situation for which the number of observational units is much larger than the number of  
61 experimental units. We will show how to use a linear mixed-effects model to correctly analyze the data  
62 in the next section.

## 63 64 **(2) Mixed-effects model analysis**

65 The word “mixed” in linear mixed-effects (LME) means that the model consists of both fixed and  
66 random effects. Fixed effects refer to fixed but unknown coefficients for the variables of interest and  
67 explanatory covariates, as identified in the traditional linear model (LM). Random effects, refer to  
68 variables that are not of direct interest - however, they may potentially lead to correlated outcomes. A  
69 major difference between fixed and random effects is that the fixed effects are considered as parameters  
70 whereas the random effects are considered as random variables drawn from a distribution (e.g., a normal  
71 distribution).

72 In order to apply the LME, it is necessary to understand its inner workings in sufficient detail. Let  
73  $Y_{ij}$  indicate the  $j^{\text{th}}$  observation of the  $i^{\text{th}}$  mouse, and  $(x_{ij,1}, \dots, x_{ij,4})$  be the dummy variables for the treatment  
74 labels with  $x_{ij,1} = 1$  for 24 hours,  $x_{ij,2} = 1$  for 48 hours,  $x_{ij,3} = 1$  for 72 hours, and  $x_{ij,4} = 1$  for 1 week after  
75 ketamine treatments, respectively. Because there are multiple observations from the same animal, the  
76 data are naturally clustered by animal. We account for the resulting dependence by adding an animal-  
77 specific mean to the regression framework discussed in the previous section, as follows:

$$78 \quad Y_{ij} = \beta_0 + x_{ij,1} \times \beta_1 + \dots + x_{ij,4} \times \beta_4 + u_i + \varepsilon_{ij}, \quad i=1, \dots, 24; j=1, \dots, n_i;$$

79 where  $n_i$  is the number of observations from the  $i^{\text{th}}$  mouse,  $u_i$  indicates the deviance between the overall  
80 intercept  $\beta_0$  and the mean specific to the  $i^{\text{th}}$  mouse, and  $\varepsilon_{ij}$  represents the deviation in pCREB  
81 immunoreactivity of observation (cell)  $j$  in mouse  $i$  from the mean pCREB immunoreactivity of mouse  $i$ .  
82 Among the coefficients, the coefficients of the fixed-effects component,  $(\beta_0, \beta_1, \beta_2, \beta_3, \beta_4)$ , are assumed  
83 to be fixed but unknown, whereas  $(u_1, \dots, u_{24})$  are treated as independent and identically distributed  
84 random variables from a normal distribution with mean 0 and a variance parameter that reflects the  
85 variation across animals. It is important to notice that the cluster/animal-specific means are more  
86 generally referred to as random intercepts in an LME. Equivalently, one could write the previous equation

87 by using a vector  $(z_{ij,1}, \dots, z_{ij,24})$  of dummy variables for the cluster/animal memberships such that  $z_{ij,k}=1$  for  
88  $i=k$  and 0 otherwise:

$$89 \quad Y_{ij} = \beta_0 + x_{ij,1} \times \beta_1 + \dots + x_{ij,4} \times \beta_4 + z_{ij,1} u_1 + \dots + z_{ij,24} u_{24} + \epsilon_{ij}, \quad l=1, \dots, 24; j=1, \dots, n_i. \quad (1)$$

90 In the model above,  $Y_{ij}$  is modeled by four components: the overall intercept  $\beta_0$ , which is the  
91 population mean of the reference group in this example, the fixed-effects from the covariates  $(x_{ij,1}, \dots,$   
92  $x_{ij,4})$ , the random-effects due to the clustering  $(z_{ij,1}, \dots, z_{ij,24})$ , and the random errors  $\epsilon_{ij}$ 's, assumed to be  
93 i.i.d. from a normal distribution with mean 0.

94 It is often convenient to write the LME in a very general matrix form, which was first derived in  
95 (Henderson et al., 1959). This format gives a compact expression of the linear mixed-effects model:

$$96 \quad Y = \mathbf{1}\beta_0 + X\beta + Z u + \epsilon,$$

97 where  $Y$  is an  $n$ -by-1 vector of individual observations,  $\mathbf{1}$  is the  $n$ -by-1 vector of ones, the columns of  $X$  are  
98 predictors whose coefficients  $\beta$ , a  $p$ -by-1 vector, are assumed to be fixed but unknown, the columns of  $Z$   
99 are the variables whose coefficients  $u$ , a  $q$ -by-1 vector, are random variables drawn from a distribution  
100 with mean 0 and a partially or completely unknown covariance matrix, and  $\epsilon$  is the residual random error.

101

## 102 Conduct LME in R

103 ***nlme*** and ***lme4*** are the two most popular R packages for LME analysis. Besides the use of slightly  
104 different syntaxes for random effects, their main functions do differ in several other ways, such as their  
105 flexibility for modeling different types of outcomes, how they handle heteroscedasticity, the covariance  
106 structure of random effects, crossed random effects, and their approximations for test statistics. A full  
107 description of these differences is beyond the scope of this article. We refer interested readers instead to  
108 the documentation for each of the two packages. Next, we show how to analyze Examples 1-3 using linear  
109 mixed effects models.

110

111 **Example 1.** The data have been described in **Part I**. We first fit a conventional linear model using the *lm*  
112 function, which erroneously pools all the neurons together and treats them as independent  
113 observations.

114

```
##### Wrong analysis #####  
> #Wrong analysis: using the linear model  
> obj.lm=lm(res~treatment_idx, data=Ex1)  
> summary(obj.lm)  
  
Call:  
lm(formula = res ~ treatment_idx, data = Ex1)
```

```

Residuals:
    Min       1Q   Median       3Q      Max
-1.7076 -0.5283 -0.1801  0.3816  5.1378

Coefficients:
            Estimate Std. Error t value Pr(>|t|)
(Intercept)  1.02619   0.03997  25.672 < 2e-16 ***
treatment_idx2  0.78286   0.05868  13.340 < 2e-16 ***
treatment_idx3  0.81353   0.07551  10.774 < 2e-16 ***
treatment_idx4  0.16058   0.07349   2.185  0.0291 *
treatment_idx5 -0.36047   0.06266  -5.753 1.11e-08 ***
---
Signif. codes:  0 '***' 0.001 '**' 0.01 '*' 0.05 '.' 0.1 ' ' 1

Residual standard error: 0.7553 on 1195 degrees of freedom
Multiple R-squared:  0.2657,    Adjusted R-squared:  0.2632
F-statistic: 108.1 on 4 and 1195 DF,  p-value: < 2.2e-16

> summary(obj.lm)$coefficients
            Estimate Std. Error  t value      Pr(>|t|)
(Intercept)  1.0261907 0.03997259 25.672363 4.064778e-116
treatment_idx2  0.7828564 0.05868406 13.340189 6.040147e-38
treatment_idx3  0.8135287 0.07550847 10.774006 6.760583e-26
treatment_idx4  0.1605790 0.07348870  2.185084 2.907634e-02
treatment_idx5 -0.3604732 0.06265813 -5.753015 1.112796e-08

> anova(obj.lm)
Analysis of Variance Table

Response: res
            Df Sum Sq Mean Sq F value    Pr(>F)
treatment_idx    4 246.62  61.656  108.09 < 2.2e-16 ***
Residuals      1195 681.65   0.570
---
Signif. codes:  0 '***' 0.001 '**' 0.01 '*' 0.05 '.' 0.1 ' ' 1

> anova(obj.lm)[1,5]
[1] 1.17392e-78

> #wrong analysis: use ANOVA
> obj.aov=aov(res~treatment_idx, data=Ex1)
> summary(obj.aov)
            Df Sum Sq Mean Sq F value Pr(>F)
treatment_idx    4 246.6   61.66  108.1 <2e-16 ***
Residuals      1195 681.6   0.57
---
Signif. codes:  0 '***' 0.001 '**' 0.01 '*' 0.05 '.' 0.1 ' ' 1

```

115

116

117

118

119

120

121

122

In this example, the parameters of major interest are the coefficients of the treatments (1: baseline; 2: 24 hours; 3: 48 hours; 4: 72 hours; 5: 1 week following treatment). The *summary* function of the *lm* object provides the estimates, standard error, t statistics, and p-values for each time point after the treatment, with the before treatment measurement used as the reference. The overall significance of the treatment factor is performed using an F test, which is available in the ANOVA table by applying the *anova* function to the *lm* object. Equivalently, one can also use the *aov* function to obtain the same ANOVA table.

123 As explained in Part I, ignoring the dependency due to clustering can lead to unacceptably high  
 124 type I error rates. We next fit a linear mixed effects model by including animal-specific means. This can  
 125 be done using either nlme::lme (the *lme* function in the *nlme* package) or lme4::lmer (the *lmer* function  
 126 in the *lme4* package), as shown below

127

```
##### Linear Mixed-effects Model #####
> #use nlme::lme
> library(nlme) #load the nlme library
> # The nlme:lme function specifies the fixed effects in the formula
> # (first argument) of the function, and the random effects
> # as an optional argument (random=). The vertical bar | denotes that
> # the cluster is done through the animal id (midx)
> obj.lme=lme(res~treatment_idx, data= Ex1, random = ~ 1|midx)
> summary(obj.lme)
Linear mixed-effects model fit by REML
  Data: Ex1
      AIC      BIC    logLik
2278.466 2314.067 -1132.233

Random effects:
Formula: ~1 | midx
      (Intercept)  Residual
StdDev:   0.5127092 0.5995358

Fixed effects:  res ~ treatment_idx
              Value Std.Error   DF   t-value p-value
(Intercept)  1.0006729 0.1963782 1176   5.095642  0.0000
treatment_idx2  0.8194488 0.2890372   19   2.835098  0.0106
treatment_idx3  0.8429473 0.3588556   19   2.348988  0.0298
treatment_idx4  0.1898432 0.3586083   19   0.529389  0.6027
treatment_idx5 -0.3199877 0.3043369   19  -1.051426  0.3063
Correlation:
      (Intr) trtm_2 trtm_3 trtm_4
treatment_idx2 -0.679
treatment_idx3 -0.547  0.372
treatment_idx4 -0.548  0.372  0.300
treatment_idx5 -0.645  0.438  0.353  0.353

Standardized Within-Group Residuals:
      Min      Q1      Med      Q3      Max
-2.5388279 -0.5761356 -0.1128839  0.4721228  8.8600545

Number of Observations: 1200
Number of Groups: 24

> #use lme4::lmer
> library(lme4) #load the lme4 library
> # The nlme:lme4 adds the random effects directly in the
> # formula (first argument) of the function
> obj.lmer=lmer(res ~ treatment_idx+(1|midx), data=Ex1)
> summary(obj.lmer)
Linear mixed model fit by REML ['lmerMod']
Formula: res ~ treatment_idx + (1 | midx)
  Data: Ex1

REML criterion at convergence: 2264.5

Scaled residuals:
      Min      1Q  Median      3Q      Max
```

```

-2.5388 -0.5761 -0.1129  0.4721  8.8601

Random effects:
  Groups   Name                Variance Std.Dev.
midx      (Intercept)            0.2629   0.5127
Residual                            0.3594   0.5995
Number of obs: 1200, groups: midx, 24

Fixed effects:
              Estimate Std. Error t value
(Intercept)    1.0007    0.1964   5.096
treatment_idx2  0.8194    0.2890   2.835
treatment_idx3  0.8429    0.3589   2.349
treatment_idx4  0.1898    0.3586   0.529
treatment_idx5 -0.3200    0.3043  -1.051

Correlation of Fixed Effects:
              (Intr) trtm_2 trtm_3 trtm_4
tretmnt_dx2 -0.679
tretmnt_dx3 -0.547  0.372
tretmnt_dx4 -0.548  0.372  0.300
tretmnt_dx5 -0.645  0.438  0.353  0.353

```

128  
129 On the method of parameter estimation for LME. Note that *lme* and *lmer* produce exactly the same  
130 coefficients, standard errors, and t statistics. By default, the *lme* and *lmer* function estimate parameters  
131 using a REML procedure. Estimation of the population parameters in LME is often conducted using  
132 maximum likelihood (ML) or REML, where REML stands for the restricted (or residual, or reduced)  
133 maximum likelihood. While the name REML sounds confusing, REML obtains unbiased estimators for the  
134 variances by accounting for the fact that some information from the data is used for estimating the fixed-  
135 effects parameters. A helpful analogy is the estimation of the population variance by the maximum  
136 likelihood estimator  $\sum_{i=1}^n (x_i - \bar{x})^2 / n$ , which is biased, or by an unbiased estimator  $\sum_{i=1}^n (x_i - \bar{x})^2 / (n -$   
137 1). This strategy is helpful when  $n$  is small.

138  
139 On the degrees of freedom and P-values. A noticeable difference between the *lme* and *lmer* outputs is  
140 that p-values are provided by *lme* but not *lmer*. The calculation of p-values in *lme* uses the degrees of  
141 freedom according to “the grouping level at which the term is estimated” (Pinheiro and Bates, 2006),  
142 which is the animal level in Example 1. However, the calculation of the degrees of freedom for a fixed  
143 model is not as straightforward as for a linear model (see the [link here](#) for some details). Several packages  
144 use more accurate approximations or bootstrap methods to improve the accuracy of p-values. In the  
145 following, we show different methods to compute (1) the overall p-value of the treatment factor, (2) p-  
146 values for individual treatments, and (3) p-value adjustment for multiple comparisons. These p-values are  
147 for testing the fixed effects. We defer the discussion related to random effects until Example 3.



148  
149  
150  
151  
152  
153

**(1) The overall p-value for the treatment factor.** This p-value aims to understand whether there is any statistically significant difference among a set of treatments. We offer several ways to calculate this type of p-values. When assessing the overall treatment effects using a likelihood ratio test, one should use maximum likelihood, rather than REML, when using *lme* or *lmer*.

```
> #overall p-value from lme
> Wald F-test from an lme object
> obj.lme=lme(res~treatment_idx, data= Ex1, random = ~ 1|midx)
> anova(obj.lme) #Wald F-test
      numDF denDF  F-value p-value
(Intercept)      1  1176 142.8589 <.0001
treatment_idx    4   19   4.6878  0.0084

> #Likelihood ratio test from lme objects
> # notice the argument of the option "method"
> # which calls for using ML instead of REML
> obj.lme0.ml=lme(res~1, data= Ex1, random = ~ 1|midx, method="ML")
> obj.lme.ml=lme(res~treatment_idx, data= Ex1, random = ~ 1|midx, method="ML")
> anova(obj.lme0.ml, obj.lme.ml)
      Model df      AIC      BIC   logLik   Test  L.Ratio p-value
obj.lme0.ml    1  3 2281.441 2296.712 -1137.721
obj.lme.ml     2  7 2272.961 2308.592 -1129.481 1 vs 2 16.48011  0.0024

#equivalently, one can conduct LRT using drop1
> drop1(obj.lme.ml, test="Chisq")
Single term deletions

Model:
res ~ treatment_idx
      Df      AIC    LRT Pr(>Chi)
<none>      2273.0
treatment_idx  4 2281.4 16.48 0.002438 **
```

154  
155  
156  
157

As noted earlier, p-values are not provided for the overall effect or individual treatments by the *lmer* function in the *lme4* package. Next, we show how to use the *lmerTest* package to calculate p-values.

```
> library(lmerTest)
> obj.lmer=lmerTest::lmer(res ~ treatment_idx+(1|midx), data=Ex1)
> #when ddf is not specified, the F test with Satterthwaite's method will be use
> anova(obj.lmer, ddf="Kenward-Roger")
Type III Analysis of Variance Table with Kenward-Roger's method
      Sum Sq Mean Sq NumDF  DenDF F value  Pr(>F)
treatment_idx  6.74   1.685     4 19.014  4.6878 0.008398 **
---
Signif. codes:  0 '***' 0.001 '**' 0.01 '*' 0.05 '.' 0.1 ' ' 1
> #likelihood ratio test
> obj.lmer.ml=lme4::lmer(res ~ treatment_idx+(1|midx), data=Ex1, REML=F)
> obj.lmer0.ml=lme4::lmer(res ~ 1+(1|midx), data=Ex1, REML=F)
> anova(obj.lmer0.ml, obj.lmer.ml)
Data: Ex1
Models:
obj.lmer0.ml: res ~ 1 + (1 | midx)
obj.lmer.ml:  res ~ treatment_idx + (1 | midx)
      npar      AIC      BIC logLik deviance Chisq Df Pr(>Chisq)
obj.lmer0.ml    3 2281.4 2296.7 -1137.7  2275.4
obj.lmer.ml     7 2273.0 2308.6 -1129.5  2259.0 16.48  4  0.002438 **
---
```

```
Signif. codes:  0 '***' 0.001 '**' 0.01 '*' 0.05 '.' 0.1 ' ' 1
> # drop1(obj.lmer.ml, test="Chisq") also works
```

158  
159 Remarks: (i) Since the function *lmer* is in both *nlme* and *lmerTest*, to ensure that the *lmer* from *lmerTest*  
160 is used, we specify the package name by using double colon: *lmerTest::lmer*. (ii) The default method of  
161 calculating the denominator degrees of freedom is Satterwhite's method. One can use the option *ddf* to  
162 choose the Kenward-Roger method, which is often preferred by many researchers. (iii) Based on the  
163 simulation studies in (Pinheiro and Bates, 2006), F tests usually perform better than likelihood ratio tests.  
164

165 **(2) P-values for individual treatments.** The effects of individual treatments are also of great  
166 interest. As shown earlier, the individual p-values from *nlme::lme* can be obtained by using the  
167 *summary* function. Similarly, one can also obtain individual p-values by using the *lmerTest*  
168 package for a model fit by *lmer*.  
169

```
> obj.lmer=lmerTest::lmer(res ~ treatment_idx+(1|midx), data=Ex1)
> #summary(obj.lmer) #Sattertwhaite's method for denominator degrees of freedom
> summary(obj.lmer, ddf="Kenward-Roger")
Linear mixed model fit by REML. t-tests use Kenward-Roger's method ['lmerModLmerTest']
Formula: res ~ treatment_idx + (1 | midx)
Data: Ex1

REML criterion at convergence: 2264.5

Scaled residuals:
  Min       1Q   Median       3Q      Max
-2.5388 -0.5761 -0.1129  0.4721  8.8601

Random effects:
 Groups   Name      Variance Std.Dev.
 midx    (Intercept) 0.2629   0.5127
 Residual                0.3594   0.5995
Number of obs: 1200, groups:  midx, 24

Fixed effects:
              Estimate Std. Error    df t value Pr(>|t|)
(Intercept)    1.0007    0.1964 18.9806   5.096 6.44e-05 ***
treatment_idx2  0.8194    0.2890 18.9745   2.835  0.0106 *
treatment_idx3  0.8429    0.3589 19.0485   2.349  0.0298 *
treatment_idx4  0.1898    0.3586 18.9960   0.529  0.6027
treatment_idx5 -0.3200    0.3043 19.0078  -1.051  0.3062
---
Signif. codes:  0 '***' 0.001 '**' 0.01 '*' 0.05 '.' 0.1 ' ' 1

Correlation of Fixed Effects:
              (Intr) trtm_2 trtm_3 trtm_4
tretmnt_dx2 -0.679
tretmnt_dx3 -0.547  0.372
tretmnt_dx4 -0.548  0.372  0.300
tretmnt_dx5 -0.645  0.438  0.353  0.353
```

170

171 **(3) P-value adjustment for multiple comparisons.** Note that the individual p-values shown above  
 172 are for the comparison between each treatment group and the control group. Multiple  
 173 comparisons have not been considered so far. Once a model is fit and an overall significance has  
 174 been established, a natural question is which treatments are different from each other among a  
 175 set of treatments. Consider Example 1, which involves five experimental conditions. The number  
 176 of comparisons to examine all pairs of conditions is 10. When using unadjusted p-values and  
 177 conducting testing at significance level  $\alpha = 0.05$ , the chance that we will make at least one false  
 178 positive is much greater than 5%. The *emmeans* package can be used to adjust p-values by taking  
 179 multiple comparisons into consideration. Two useful options are (i) the adjustment of multiple  
 180 comparisons for all pairs of treatment by adding “pairwise” and (ii) the adjustment for  
 181 comparisons for all the treatments to the control by adding “trt.vs.ctrl” and specifying the  
 182 reference group, which is group “1” in this example.

183

```

> library(emmeans)
> obj.lmer=lme4::lmer(res ~ treatment_idx+(1|midx), data=Ex1)
> contrast(emmeans(obj.lmer, specs="treatment_idx"), "pairwise")
contrast estimate SE df t.ratio p.value
1 - 2 -0.8194 0.289 19.0 -2.835 0.0704
1 - 3 -0.8429 0.359 19.1 -2.349 0.1727
1 - 4 -0.1898 0.359 19.0 -0.529 0.9832
1 - 5 0.3200 0.304 19.0 1.051 0.8283
2 - 3 -0.0235 0.368 19.0 -0.064 1.0000
2 - 4 0.6296 0.367 19.0 1.713 0.4496
2 - 5 1.1394 0.315 19.0 3.621 0.0138
3 - 4 0.6531 0.425 19.0 1.538 0.5517
3 - 5 1.1629 0.380 19.1 3.062 0.0447
4 - 5 0.5098 0.380 19.0 1.343 0.6690

Degrees-of-freedom method: kenward-roger
P value adjustment: tukey method for comparing a family of 5 estimates

> #the default method of degrees of freedom is Kenward-Roger's method
> contrast(emmeans(obj.lmer, specs="treatment_idx"), "trt.vs.ctrl", ref = "1")
contrast estimate SE df t.ratio p.value
2 - 1 0.819 0.289 19.0 2.835 0.0364
3 - 1 0.843 0.359 19.1 2.349 0.0965
4 - 1 0.190 0.359 19.0 0.529 0.9219
5 - 1 -0.320 0.304 19.0 -1.051 0.6613

Degrees-of-freedom method: kenward-roger
P value adjustment: dunnett method for 4 tests
  
```

184  
 185 In the pairwise adjustment for Example 1, one examines all the ten pairs, listed as “1-2”, ..., “4-5”. When  
 186 only the difference between each of the four treatments and the control is of interest, the number of  
 187 comparisons reduced to four. As a result, the adjusted p-values for all pairs are less significant than the  
 188 adjusted p-values based on “trt.vs.ctrl”.

189

190 ***A final note on p-values for Example 1.*** Instead of relying on large-sample distributions or approximations  
191 based on F distributions, the *pbkrtest* package provides a parametric bootstrap test to compare two  
192 models, as shown below. Resampling methods, such as bootstrap, are often believed to be more robust  
193 than their parametric counterparts.

194

```
195 > library(pbkrtest)
196 > obj.lmer=lmerTest::lmer(res ~ treatment_idx+(1|midx), data=Ex1)
197 > obj.lmer0=lmerTest::lmer(res ~ 1+(1|midx), data=Ex1)
198 > PBmodcomp(obj.lmer, obj.lmer0)
199 Bootstrap test; time: 30.42 sec; samples: 1000; extremes: 13;
200 large : res ~ treatment_idx + (1 | midx)
201 res ~ 1 + (1 | midx)
202           stat df  p.value
203 LRT      15.905  4 0.003149 **
204 PBtest  15.905   0.013986 *
205 ---
206 Signif. codes:  0 '***' 0.001 '**' 0.01 '*' 0.05 '.' 0.1 ' ' 1
```

207

208 There are other potentially useful alternative functions, such as *car::Anova*, and *sjPlot::plot\_scatter*,  
209 *sjPlot::plot\_model*. We provide sample code and encourage interested readers to continue exploring  
210 these packages if they wish to compare additional tools.

211

```
Library(car) #load the car library
library(sjPlot) #load the sjPlot library
obj.lmer=lme4::lmer(res ~ treatment_idx+(1|midx), data=Ex1)
car::Anova(obj.lmer, test.statistic="F")
sjPlot::plot_model(obj.lmer)
plot_scatter(Ex1, midx, res, treatment_idx)
```

212

213

214

215 **Example 2.** Data were derived from an experiment to determine how *in vivo* calcium (Ca<sup>++</sup>) activity of PV  
 216 cells (measured longitudinally by the genetically encoded Ca<sup>++</sup> indicator GCaMP6s) changes over time after  
 217 ketamine treatment. We show four mice whose Ca<sup>++</sup> event frequencies were measured at 24h, 48h, 72h,  
 218 and 1 week after ketamine treatment and compare Ca<sup>++</sup> event frequency at 24h to the other three time  
 219 points. In total, Ca<sup>++</sup> event frequencies of 1,724 neurons were measured. First let us evaluate the effect of  
 220 ketamine using LM (or ANOVA, which ignores mouse-specific effect).

221

```
### read the data
Ex2=read.csv("Example2.txt", head=T)
Ex2$treatment_idx=Ex2$treatment_idx-4
Ex2$treatment_idx=as.factor(Ex2$treatment_idx)
### change the variable of mouse IDs to a factor
Ex2$midx=as.factor(Ex2$midx)

### wrong analysis: using the linear model
lm.obj=lm(res~treatment_idx, data=Ex2)
> summary(lm.obj)

Call:
lm(formula = res ~ treatment_idx, data = Ex2)

Residuals:
    Min       1Q   Median       3Q      Max
-0.66802 -0.10602 -0.00916  0.09028  2.43137

Coefficients:
            Estimate Std. Error t value Pr(>|t|)
(Intercept)  0.714905   0.012337  57.946 < 2e-16 ***
treatment_idx2 -0.078020   0.017011  -4.586 4.84e-06 ***
treatment_idx3  0.009147   0.017189   0.532 0.59467
treatment_idx4  0.049716   0.016332   3.044 0.00237 **
---
Signif. codes:  0 '***' 0.001 '**' 0.01 '*' 0.05 '.' 0.1 ' ' 1

Residual standard error: 0.2414 on 1720 degrees of freedom
Multiple R-squared:  0.03715,    Adjusted R-squared:  0.03548
F-statistic: 22.12 on 3 and 1720 DF,  p-value: 4.677e-14
```

222

223 The LM (including ANOVA, t-test) analysis results indicate significantly reduced Ca<sup>++</sup> activity at 48h  
 224 relative to 24h with p=4.8x10<sup>-6</sup>, and significantly increased Ca<sup>++</sup> event frequency at 1week compared to  
 225 24h with p=2.4x10<sup>-3</sup>. However, if we account for repeated measures due to cells clustered in mice using  
 226 LME, most of p-values are greater than 0.05 except that the overall p-value is 0.04.

227

```
### lme
> lme.obj=lme(res~treatment_idx, random=~ 1| midx, data= Ex2, method="ML")
> summary(lme.obj)
Linear mixed-effects model fit by maximum likelihood
Data: Ex2
      AIC      BIC    logLik
```

```

-781.3599 -748.6664 396.6799

Random effects:
Formula: ~1 | midx
(Intercept) Residual
StdDev: 0.07396325 0.1911732

Fixed effects: res ~ treatment_idx
              Value Std.Error DF t-value p-value
(Intercept)  0.6857786 0.03841845 1711 17.850242 0.0000
treatment_idx2 -0.0114193 0.01426559 1711 -0.800479 0.4235
treatment_idx3  0.0196507 0.01365505 1711  1.439077 0.1503
treatment_idx4  0.0249234 0.01367244 1711  1.822893 0.0685
Correlation:
      (Intr) trtm_2 trtm_3
treatment_idx2 -0.183
treatment_idx3 -0.185  0.495
treatment_idx4 -0.195  0.462  0.526

Standardized Within-Group Residuals:
      Min      Q1      Med      Q3      Max
-3.33823301 -0.45681799  0.05440281  0.36978166  4.13882285

Number of Observations: 1718
Number of Groups: 4
> anova(lme.obj)
              numDF denDF F-value p-value
(Intercept)      1  1711 345.8873 <.0001
treatment_idx    3  1711  2.7761  0.04

```

228  
229 The results (estimates ± s.e., and p-values) the Ca<sup>++</sup> event frequency data using LM and LME (Example 2).  
230

|         | 48h                  | 72h         | 1wk                  |
|---------|----------------------|-------------|----------------------|
| LM est  | -0.078±0.017         | 0.009±0.017 | 0.050±0.016          |
| LM p    | 4.8x10 <sup>-6</sup> | 0.595       | 2.4x10 <sup>-3</sup> |
| LME est | -0.011±0.014         | 0.020±0.014 | 0.025±0.014          |
| LME p   | 0.424                | 0.150       | 0.069                |

231  
232 To understand the discrepancy between the results from LM and LME, we created boxplots using  
233 individual mice as well as all the mice (Figure S2). Although the pooled data and the corresponding p-  
234 value from the LM show significant reduction in Ca<sup>++</sup> activities from 24h to 48h, we see that the only  
235 mouse showing a noticeable reduction was Mouse 2. In fact, a close examination of the figure below  
236 suggests that there might be small increases in the other three mice.

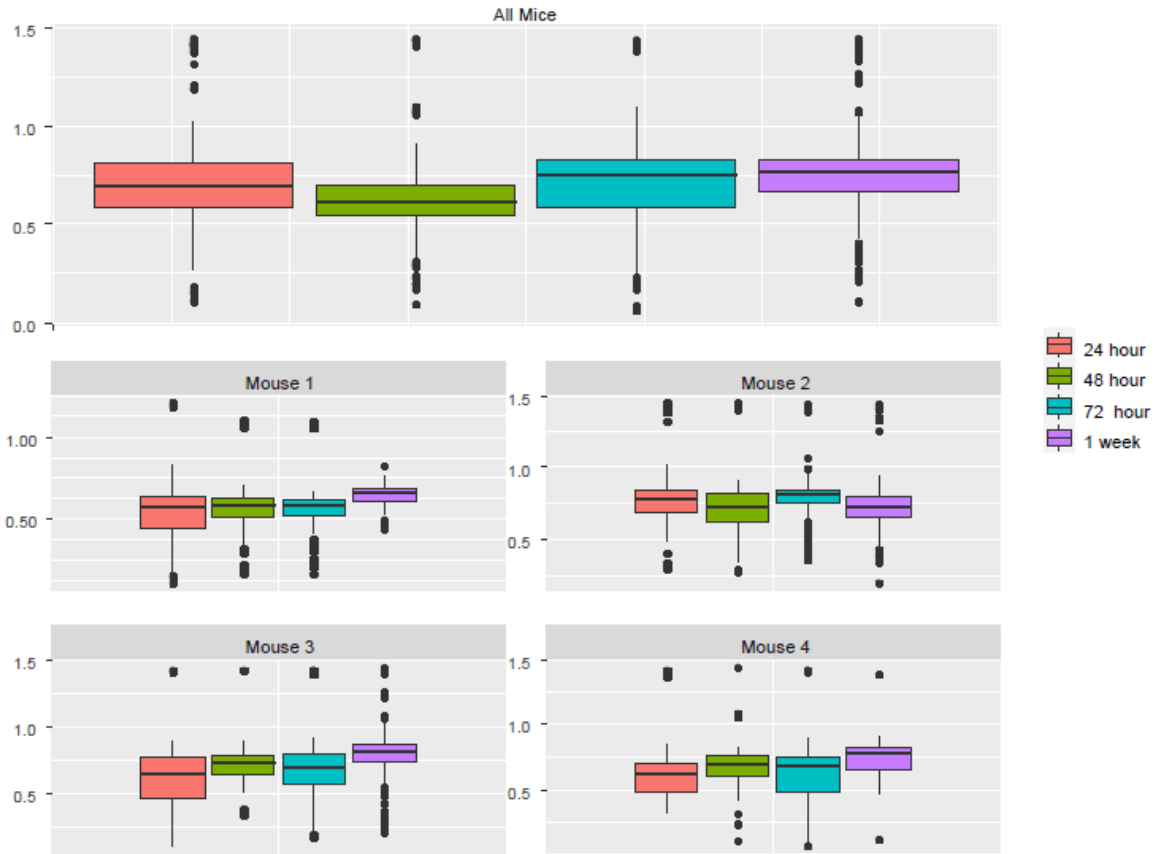

237  
 238 Figure S2: The boxplots of Ca<sup>++</sup> event frequencies measured at four time points. (A) Boxplot of Ca<sup>++</sup> event  
 239 frequencies using the pooled neurons from four mice. (B) boxplots of Ca<sup>++</sup> event frequencies stratified by  
 240 individual mice.

241  
 242 To examine why the pooled data follow the pattern of Mouse 2 and not that of other mice, we  
 243 checked the number of neurons in each of the mouse-by-time combinations.

244

```
# one mouse contributed 43% cells
# the number of cells in each animal-time combination
table(Ex2$midx, Ex2$treatment_idx)
# compute the percent of cells contributed by each mouse
rowSums(table(Ex2$midx, Ex2$treatment_idx))/1724
```

245

246

|         | 24h | 48h | 72h | 1wk | Total        |
|---------|-----|-----|-----|-----|--------------|
| Mouse 1 | 81  | 254 | 88  | 43  | 466 (27%)    |
| Mouse 2 | 206 | 101 | 210 | 222 | 739 (43%)    |
| Mouse 3 | 33  | 18  | 51  | 207 | 309 (18%)    |
| Mouse 4 | 63  | 52  | 58  | 37  | 210 (12%)    |
| Total   | 383 | 425 | 407 | 509 | 1,724 (100%) |

247

248           The last column of the table above shows that Mouse 2 contributed 43% cells, which likely  
249 explains why the pooled data are more similar to Mouse 2 than to the other mice. The lesson from this  
250 example is that naively pooling data from different animals is a potentially dangerous practice, as the  
251 results can be dominated by a single animal that can misrepresent the data. Application of LME solves  
252 this troubling potential problem as it takes dependency and weighting into account.

253           In this example, the number of levels in the random-effects variable is four, as there are four mice.  
254 This number may be smaller than the recommended number for using random-effects. However, as  
255 discussed in Gelman and Hill (2007), using a random-effects model in this situation of a small sample size  
256 might not do much harm. An alternative is to include the animal ID variable as a factor with fixed animal  
257 effects in the conventional linear regression. Note that neither of the two analyses is the same as fitting a  
258 linear model to the pooled cells together, which erroneously ignores the between-animal heterogeneity  
259 and fails to account for the data dependency due to the within-animal similarity. In a more extreme case,  
260 for an experiment using only two monkeys for example, naively pooling the neurons from the two animals  
261 faces the risk of making conclusions mainly from one animal and unrealistic homogeneous assumptions  
262 across animals, as discussed above. A more appropriate approach is to analyze the animals separately  
263 and check whether the results from these two animals “replicate” each other. Exploratory analysis such  
264 as data visualization is highly recommended to identify potential issues.

265  
266



267 **Example 3.** In this experiment, Ca<sup>++</sup> event integrated amplitudes are compared between baseline and 24h  
 268 after ketamine treatment. 622 cells were sampled from 11 mice and each cell was measured twice  
 269 (baseline and after ketamine treatment). As a result, correlation arises from both cells and animals, which  
 270 creates a three-level structure: measurements within cells and cells within animals. It is clear that the  
 271 ketamine treatment should be treated as a fixed effect. The choice for random effects deserves more  
 272 careful consideration. The hierarchical structure, i.e., two observations per cell and multiple cells per  
 273 animal suggests that the random effects of cells should be nested within individual mice. By including the  
 274 cell variable in the random effect, we implicitly use the change from “before” to “after” treatment for  
 275 each cell. This is similar to how paired data are handled in a paired t-test. Moreover, by specifying that  
 276 the cells are nested within individual mice, we essentially model the correlations at both mouse and cell  
 277 levels.  
 278

```

> Ex3=read.csv("Example3.txt", head=T)
>
> ##### wrong analysis: using the linear model
> summary(lm(res~treatment, data=Ex3[!is.na(Ex3$res),])) #0.0036

Call:
lm(formula = res ~ treatment, data = Ex3[!is.na(Ex3$res), ])

Residuals:
    Min       1Q   Median       3Q      Max
-3.1311 -1.3203 -0.1806  1.1438  6.7518

Coefficients:
            Estimate Std. Error t value Pr(>|t|)
(Intercept)  2.73206    0.10817  25.258  <2e-16 ***
treatment    0.19952    0.06847   2.914   0.0036 **
---
Signif. codes:  0 '***' 0.001 '**' 0.01 '*' 0.05 '.' 0.1 ' ' 1

Residual standard error: 1.708 on 2487 degrees of freedom
Multiple R-squared:  0.003403, Adjusted R-squared:  0.003002
F-statistic: 8.492 on 1 and 2487 DF, p-value: 0.0036
> ##### wrong analysis using t tests (paired or unpaired)
> t.test(Ex3[Ex3$treatment==1,"res"], Ex3[Ex3$treatment==2,"res"], var.eq=T)
> t.test(Ex3[Ex3$treatment==1,"res"], Ex3[Ex3$treatment==2,"res"])
> t.test(Ex3[Ex3$treatment==1,"res"], Ex3[Ex3$treatment==2,"res"], paired=T)

>#correct analysis
> lme.obj=lme(res~ treatment, random =~1| midx/cidx, data= Ex3[!is.na(Ex3$res),] ,
method="ML")
> summary(lme.obj)
Linear mixed-effects model fit by maximum likelihood
  Data: Ex3[!is.na(Ex3$res), ]
      AIC      BIC    logLik
9378.498 9407.596 -4684.249

Random effects:
Formula: ~1 | midx

```

```

(Intercept)
StdDev:      0.404508

Formula: ~1 | cidx %in% midx
(Intercept) Residual
StdDev:      1.083418 1.259769

Fixed effects:  res ~ treatment
                Value Std.Error   DF   t-value p-value
(Intercept)  2.7983541 0.15017647 1240 18.633772  0e+00
treatment    0.1934755 0.05055295 1240  3.827184 1e-04
Correlation:
(Intr)
treatment -0.504

Standardized Within-Group Residuals:
      Min      Q1      Med      Q3      Max
-2.69833206 -0.60733714 -0.09362515  0.52748499  3.91394332

Number of Observations: 2489
Number of Groups:
      midx cidx %in% midx
      11      1248

```

279  
280 For the treatment effect, LME and LM produce similar estimates; however, the standard error of  
281 the LM is larger. As a result, the p-value based on LME is smaller (0.0036 for LM vs 0.0001 for LME). In  
282 this example, since the two measures from each cell are positively correlated, as shown in the Figure S3,  
283 the variance of the differences is smaller when treating the data as paired rather than independent. As a  
284 result, LME produces a smaller p-value than the t-test. As a result, the more rigorous practice of using cell  
285 effects as random effects leads to a lower p-value for Example 3.

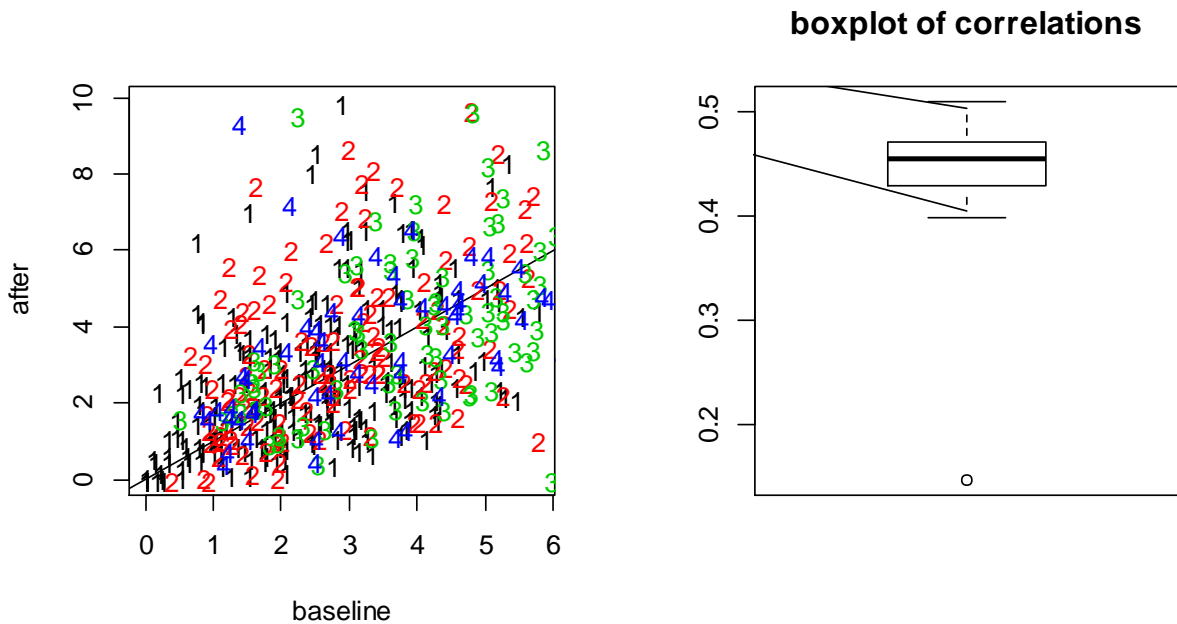

287 Figure S3: (Left) the scatter plot of Ca<sup>++</sup> event integrated amplitude at baseline vs 24h after treatment for  
 288 the neurons from four mice (labeled as 1, 2, 3 and 4) indicates that the baseline and after-treatment  
 289 measures are positively correlated. (Right) boxplot of the baseline and after-treatment correlations of the  
 290 11 mice.

291  
 292 A note on “nested” random effects. When specifying the nested random effects, we used “random  
 293 =~1| midx/cidx”. This leads to random effects at two levels: the mouse level and the cells-within-mouse  
 294 level. This specification is important if same cell IDs might appear in different mice. When each cell has its  
 295 unique ID, just like “cidx” variable in Example 3, it does not matter and “random =list(midx=~1, cidx=~1)”  
 296 leads to exactly the same model.

```
### to verify that the cell IDs are indeed unique
> length(unique(Ex3$cidx))
[1] 1248

#lme.obj2 is the same as lme.obj
> lme.obj2=lme(res~ treatment, random =list(midx=~1, cidx=~1), data=
Ex3[!is.na(Ex3$res),] , method="ML")
> summary(lme.obj2)
Linear mixed-effects model fit by maximum likelihood
  Data: Ex3[!is.na(Ex3$res), ]
      AIC      BIC    logLik
 9378.498 9407.596 -4684.249

Random effects:
  Formula: ~1 | midx
          (Intercept)
  StdDev:    0.404508

          Formula: ~1 | cidx %in% midx
          (Intercept) Residual
  StdDev:    1.083418 1.259769

Fixed effects:  res ~ treatment
              Value Std.Error DF t-value p-value
(Intercept) 2.7983541 0.15017647 1240 18.633772 0e+00
treatment  0.1934755 0.05055295 1240  3.827184 1e-04
Correlation:
  (Intr)
treatment -0.504

Standardized Within-Group Residuals:
      Min      Q1      Med      Q3      Max
-2.69833206 -0.60733714 -0.09362515  0.52748499  3.91394332

Number of Observations: 2489
Number of Groups:
      midx cidx %in% midx
      11      1248
```

297  
 298  
 299 On models with more random effects. The above LME model only involves random intercepts.  
 300 When there are random effects due to multiple sources, it is often recommended to fit a large model (in  
 301 the sense of as many random effects as possible) to avoid obtaining false positives. However, studies also

302 find that fitting the maximal model can cause decreased statistical power. Visualization is a useful  
 303 exploratory tool to help identify an appropriate model. Figure S4 shows two common ways to visualize  
 304 data in an exploratory data analysis: the scatter plots and the so-called “spaghetti” plots. The spaghetti  
 305 plots indicate that neurons are quite different from each other in terms of both baseline values and  
 306 changes; the scatter plots with linear model fit suggest that the animals are different from each other at  
 307 least at the starting baseline. Together, they suggest that random slopes are needed at least at the neuron  
 308 level.

309 Here we consider three alternative models (lme.obj3, lme.obj4, lme.obj5) that include additional  
 310 random effects. More specifically, lme.obj3 includes random slopes only at the neuron level; lme.obj4  
 311 includes random slopes only at the animal level; and lme.obj5 includes random slopes for both neurons  
 312 and animals.

313

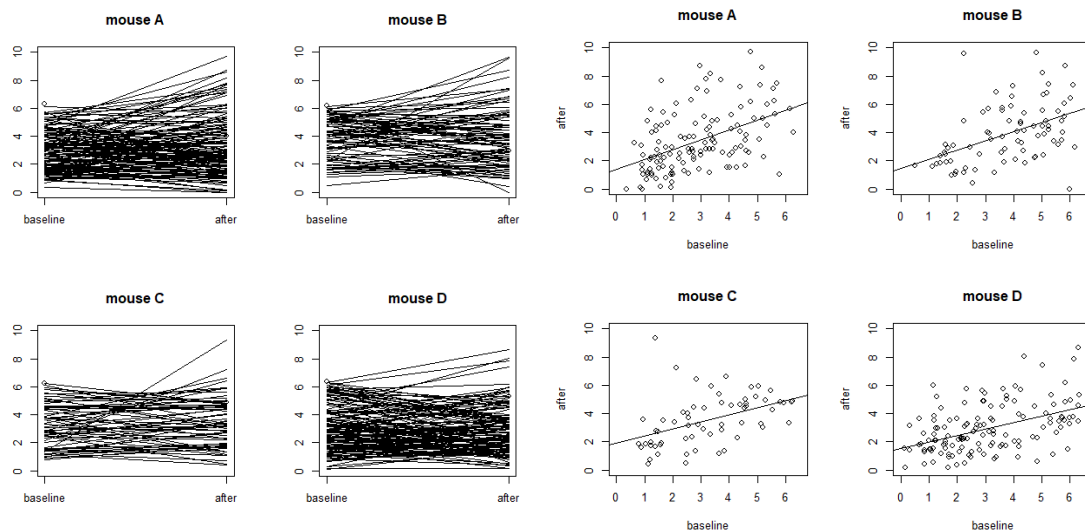

314  
 315 Figure S4: Ca<sup>++</sup> event integrated amplitudes at baseline vs 24h after treatment for the neurons from four  
 316 mice (labeled as A, B, C and D) with each dot representing a neuron. The four plots on the left are  
 317 “spaghetti” plots of the four animals with each line representing the values at baseline and 24h after  
 318 treatment for a neuron; the four plots on the right report the before-after scatter plots (with fitted straight  
 319 lines using a simple linear regression).

320

321

```

> #mouse: random intercepts; neuron: both random intercepts and random slopes
> #(independence not assumed)
> lme.obj3=lme(res~ treatment, random=list(midx=~1, cidx=~treatment), data=
Ex3[!is.na(Ex3$res),], method="ML")
> summary(lme.obj3)
Linear mixed-effects model fit by maximum likelihood
Data: Ex3[!is.na(Ex3$res), ]
      AIC      BIC    logLik
9272.45 9313.187 -4629.225
  
```

```

Random effects:
  Formula: ~1 | midx
            (Intercept)
StdDev:    0.4302823

  Formula: ~treatment | cidx %in% midx
  Structure: General positive-definite, Log-Cholesky parametrization
            StdDev  Corr
(Intercept) 1.529776 (Intr)
treatment   1.159775 -0.724
Residual    0.956257

Fixed effects: res ~ treatment
              Value Std.Error DF t-value p-value
(Intercept) 2.808037 0.15076357 1240 18.625434 0e+00
treatment   0.191860 0.05057672 1240 3.793445 2e-04
Correlation:
  (Intr)
treatment -0.425

Standardized Within-Group Residuals:
      Min      Q1      Med      Q3      Max
-2.26228406 -0.47042693 -0.07585988 0.42870152 2.37367673

Number of Observations: 2489
Number of Groups:
      midx cidx %in% midx
      11      1248
> anova(lme.obj1, lme.obj3)
      Model df      AIC      BIC      logLik      Test L.Ratio p-value
lme.obj1   1  5 9378.498 9407.596 -4684.249
lme.obj3   2  7 9272.450 9313.187 -4629.225 1 vs 2 110.0484 <.0001
>
> #mouse: random intercepts and random slopes (independence not assumed); neuron:
random intercepts
> lme.obj4=lme(res~ treatment, random=list(midx=~treatment, cidx=~1), data=
Ex3[!is.na(Ex3$res),], method="ML")
> summary(lme.obj4)
Linear mixed-effects model fit by maximum likelihood
Data: Ex3[!is.na(Ex3$res), ]
      AIC      BIC      logLik
 9379.713 9420.451 -4682.857

Random effects:
  Formula: ~treatment | midx
  Structure: General positive-definite, Log-Cholesky parametrization
            StdDev  Corr
(Intercept) 0.5482023 (Intr)
treatment   0.1393209 -0.784

  Formula: ~1 | cidx %in% midx
            (Intercept) Residual
StdDev:    1.085417 1.256165

Fixed effects: res ~ treatment
              Value Std.Error DF t-value p-value
(Intercept) 2.822533 0.18848581 1240 14.97477 0.0000
treatment   0.178527 0.06703098 1240 2.66335 0.0078
Correlation:
  (Intr)
treatment -0.758

Standardized Within-Group Residuals:

```

```

      Min      Q1      Med      Q3      Max
-2.6551618 -0.6096016 -0.0860911  0.5312087  3.8846466

Number of Observations: 2489
Number of Groups:
      midx cidx %in% midx
      11      1248
> #mouse: random intercepts and random slopes; neuron: random intercepts and random
slopes
> lme.obj5=lme(res~ treatment, random= ~ 1+treatment | midx/cidx, data=
Ex3[!is.na(Ex3$res),], method="ML")
> summary(lme.obj5)
Linear mixed-effects model fit by maximum likelihood
Data: Ex3[!is.na(Ex3$res), ]
      AIC      BIC    logLik
      9272.72 9325.097 -4627.36

Random effects:
Formula: ~1 + treatment | midx
Structure: General positive-definite, Log-Cholesky parametrization
      StdDev      Corr
(Intercept) 0.5727292 (Intr)
treatment   0.1423942 -0.84

Formula: ~1 + treatment | cidx %in% midx
Structure: General positive-definite, Log-Cholesky parametrization
      StdDev      Corr
(Intercept) 1.5670930 (Intr)
treatment   1.1781355 -0.731
Residual    0.9400533

Fixed effects: res ~ treatment
      Value Std.Error DF t-value p-value
(Intercept) 2.8318145 0.18997195 1240 14.906488 0.0000
treatment   0.1745063 0.06743067 1240 2.587937 0.0098
Correlation:
      (Intr)
treatment -0.758

Standardized Within-Group Residuals:
      Min      Q1      Med      Q3      Max
-2.24686402 -0.46954860 -0.07119766  0.42205349  2.36058720

Number of Observations: 2489
Number of Groups:
      midx cidx %in% midx
      11      1248
> anova(lme.obj1, lme.obj3)
      Model df      AIC      BIC    logLik    Test  L.Ratio p-value
lme.obj1    1  5 9378.498 9407.596 -4684.249
lme.obj3    2  7 9272.450 9313.187 -4629.225 1 vs 2 110.0484 <.0001
> anova(lme.obj1, lme.obj4)
      Model df      AIC      BIC    logLik    Test  L.Ratio p-value
lme.obj1    1  5 9378.498 9407.596 -4684.249
lme.obj4    2  7 9379.713 9420.451 -4682.857 1 vs 2 2.784563 0.2485
> anova(lme.obj3, lme.obj5)
      Model df      AIC      BIC    logLik    Test  L.Ratio p-value
lme.obj3    1  7 9272.45 9313.187 -4629.225
lme.obj5    2  9 9272.72 9325.097 -4627.360 1 vs 2 3.729136 0.155

```

323 The comparisons indicate that lme.obj3 improves the basic model lme.obj1 substantially; the  
324 improvement brought by lme.obj4 is less impressive; and lme.obj3, the model with random intercepts  
325 and slopes at the neuron level, and random intercepts at the animal level appears adequate. This is  
326 supported by the observable differences in baseline values and changes even for cells within the same  
327 animal (Figure S4). This suggests that including random intercepts and slopes at the neuron level is  
328 necessary.

329

330 *A note on the testing of random-effects.* The comparisons using the “*anova*” function suggests that  
331 lme.obj4, which assumes random intercepts and random slopes at the animal level and random intercepts  
332 at neuron level, might be adequate. It should be kept in mind that these comparisons based on likelihood  
333 ratio tests and the p-values are conservative. This is because these hypothesis problems are testing  
334 parameters at their boundary (Self and Liang 1987). Without getting into many details, the consequence  
335 is that the null distribution for the likelihood ratio test is no longer valid and the p-value will be  
336 overestimated. Obtaining the correct null distribution is not straightforward and requires advanced  
337 considerations beyond the scope of this article. However, (Fitzmaurice et al., 2012) suggests the ad-hoc  
338 rule to use a level of significance  $\alpha=0.1$ , instead of the typical  $\alpha =0.05$ , when judging the statistical  
339 significance of the likelihood ratio test. We adopted this suggestion in interpreting the results above.

340 It should also be noted that decisions should not be based on tests and p-values alone. Results  
341 can be significant with a very small effect size and large sample size or might not reach significance from  
342 a moderate or large effect size but based on a small sample size. Rather, these decisions should be based  
343 on study design, scientific reasoning, experience, or previous studies. For example, different animals are  
344 expected to have different mean levels on outcome variables; thus, it is reasonable to model the variation  
345 due to animals by considering animal specific effects. A similar argument is the inclusion of baseline  
346 covariates such as age in many medical studies even when they are not significant. Also, when random  
347 slopes are included, it is typically recommended to include the corresponding random intercepts. For  
348 example, if the random slopes (for treatment) are included at the animal level, it is also sensible to include  
349 the animal-specific random intercepts.

350

### 351 **Conduct GLMM using R.**

352 Traditional linear models and LME should be designed to model a continuous outcome variable  
353 with a fundamental assumption that its variance does not change with its mean. This assumption is easily  
354 violated for commonly collected outcome variables, such as the choice made in a two-alternative forced

355 choice task (binary data), the proportion of neurons activated (proportional data), the number neural  
356 spikes in a given time window, and the number of behavioral freezes in each session (count data). These  
357 types of outcome variables can be analyzed using a framework called generalized linear models, which  
358 are further extended to generalized linear mixed-effects models (GLMM) for correlated data. The  
359 computation involved in GLMM is more much challenging. The “*glmer*” function in the *lme4* package can  
360 be used to fit a GLMM, which will be shown in Example 4.

361

362 **Example 4.** In the previous examples, the outcomes of interest are continuous. In particular, some were  
363 transformed from original measures so that the distribution of the outcome variable still has a rough  
364 bell shape. In many situations, the outcome variable we are interested has a distribution that far away  
365 from normal. Consider a simulated data set based upon part of the data used in Wei et al 2020. In our  
366 simulated data, a tactile delayed response task, eight mice were trained to use their whiskers to predict  
367 the location (left or right) of a water pole and report it with directional licking (lick left or lick right). The  
368 behavioral outcome we are interested in is whether the animals made the correct predictions.  
369 Therefore, we code correct left or right licks as 1 and erroneous licks as 0. In total, 512 trials were  
370 generated, which include 216 correct trials and 296 wrong trials. One question we would like to answer  
371 is whether a particular neuron is associated with the prediction. For that purpose, we analyze the  
372 prediction outcome and mean neural activity levels (measured by dF/F) from the 512 trials using a  
373 GLMM. The importance of modeling correlated data by introducing random effects has been shown in  
374 the previous examples. In this example, we focus on how to interpret results from a GLMM model in  
375 the water lick experiment.

376 Like a GLM, a GLMM requires the specification of a family of the distributions of the outcomes  
377 and an appropriate link function. Because the outcomes in this example are binary, the natural choice,  
378 which is often called the canonical link of the “binomial” family, is the logistic link. For each family of  
379 distributions, there is a canonical link, which is well defined and natural to that distribution family. For  
380 researchers with limited experience with GLM or GLMM, a good starting point, which is often a  
381 reasonable choice, is to use the default choice (i.e., the canonical link).

```
library(lme4) #the main functions are "lmer" and glmer
library(pbkrtest)

#read data from the file named "waterlick_sim.txt"
waterlick=read.table("waterlick_sim.txt", head=T)
#take a look at the data
summary(waterlick)
#change the mouseID to a factor
waterlick[,1]=as.factor(waterlick[,1])
#use glmer to fit a GLMM model
```



```

obj.glm=glmer(lick~dff+(1|mouseID),
              data=waterlick,family="binomial")
#summarize the model
> summary(obj.glm)
Generalized linear mixed model fit by maximum likelihood (Laplace Approximation)
[glmerMod]
]
Family: binomial (logit)
Formula: lick ~ dff + (1 | mouseID)
Data: waterlick

      AIC      BIC   logLik deviance df.resid
 679.8    692.5   -336.9   673.8     509

Scaled residuals:
   Min       1Q   Median       3Q      Max
-1.4854 -0.8375 -0.6196  1.0265  1.9641

Random effects:
 Groups Name      Variance Std.Dev.
mouseID (Intercept) 0.106    0.3255
Number of obs: 512, groups: mouseID, 8

Fixed effects:
              Estimate Std. Error z value Pr(>|z|)
(Intercept) -0.63382    0.17753  -3.570 0.000357 ***
dff          0.06235    0.01986   3.139 0.001693 **
---
Signif. codes:  0 '***' 0.001 '**' 0.01 '*' 0.05 '.' 0.1 ' ' 1

Correlation of Fixed Effects:
 (Intr)
dff -0.550
#compute increase in odds and a 95% CI
> exp(c(0.06235, 0.06235-1.96*0.01986, 0.06235+1.96*0.01986))-1
[1] 0.06433480 0.02370091 0.10658157

```

382  
383           The default method of parameter estimation is the maximum likelihood with Laplace  
384 approximation. As shown in the Fixed effects section of the R output, the estimated increase in log-odds  
385 associated with one percent increase in dF/F is 0.06235 with a standard error of 0.01986 and the p-value  
386 (which is based on the large-sample Wald test) is 0.01693. Correspondingly, an approximate 95% CI is  
387 (0.06235-1.96\*0.01986, 0.06235+1.96\*0.01986), i.e., (0.0234244 0.1012756). In a logistic regression, the  
388 estimated coefficient of an independent variable is typically interpreted using the percentage of odds  
389 changed for a one-unit increase in the independent variable. In this example,  $\exp(0.06235)=1.064$ ,  
390 indicating that the odds of making correct licks increased by 6.4% (95% C.I.: 2.4%-10.7%) with one  
391 percent increase in dF/F.

392           An alternative way to compute a p-value is to use a likelihood ratio test by comparing the  
393 likelihoods of the current model and a reduced model.

394

```

#fit a smaller model, the model with the dff variable removed
obj.glm.smaller=glmer(lick~(1|mouseID),

```

```

data=waterlick,family="binomial")
#use the anova function to compare the likelihoods of the two models
> anova(obj.glmm, obj.glmm.smaller)
Data: waterlick
Models:
obj.glmm.smaller: lick ~ (1 | mouseID)
obj.glmm: lick ~ dff + (1 | mouseID)
      npar    AIC    BIC  logLik deviance  Chisq Df Pr(>Chisq)
obj.glmm.smaller    2 687.77 696.24 -341.88   683.77
obj.glmm             3 679.77 692.48 -336.88   673.77 9.9964  1  0.001568 **
---
Signif. codes:  0 '***' 0.001 '**' 0.01 '*' 0.05 '.' 0.1 ' ' 1

#alternatively, one can use the "drop1" function to test the effect of dfff
> drop1(obj.glmm, test="Chisq")
Single term deletions

Model:
lick ~ dff + (1 | mouseID)
      npar    AIC    LRT  Pr(Chi)
<none>     679.77
dff        1 687.77 9.9964 0.001568 **
---
Signif. codes:  0 '***' 0.001 '**' 0.01 '*' 0.05 '.' 0.1 ' ' 1

```

395  
396 In the output from “anova(obj.glmm, obj.glmm.smaller)”, the “Chisq” is the  $-2 \cdot \log(L0/L1)$ ,  
397 where L1 is the maximized likelihood of the model with dff and L0 is the maximized likelihood of the  
398 model without the dff. The p-value was obtained using the large-sample likelihood ratio test.

399 In GLMM, the p-value based on large-sample approximations might not be accurate. It is helpful  
400 to check whether nonparametric tests lead to similar findings. For example, one can use a parametric  
401 bootstrap method. For this example, the p-value from the parametric bootstrap test, which is slightly  
402 less significant than the p-values from the Wald or LRT test.

403

```

> PBmodcomp(obj.glmm, obj.glmm.smaller)
Bootstrap test; time: 333.45 sec; samples: 1000; extremes: 0;
Requested samples: 1000 Used samples: 999 Extremes: 0
large : lick ~ dff + (1 | mouseID)
small  : lick ~ (1 | mouseID)
      stat df  p.value
LRT    9.9964  1 0.001568 **
PBtest 9.9964  0.001000 ***
---
Signif. codes:  0 '***' 0.001 '**' 0.01 '*' 0.05 '.' 0.1 ' ' 1
There were 16 warnings (use warnings() to see them)

```

404  
405 By default, 1000 samples were generated to understand the null distribution of the likelihood  
406 ratio statistic. When a p-value is small, 1000 samples might not return an accurate estimation. In this  
407 situation, one can increase the number of samples to 10,000 or even more. One way to expedite  
408 computation is by using multiple cores. We encourage the interested readers to read the

409 documentation of this package, which is available at [https://cran.r-](https://cran.r-project.org/web/packages/pbkrtest/pbkrtest.pdf)  
410 [project.org/web/packages/pbkrtest/pbkrtest.pdf](https://cran.r-project.org/web/packages/pbkrtest/pbkrtest.pdf).

411 *A note on convergence.* Compared to LME, GLMM is harder to converge. When increasing the number  
412 of iterations does not work, one can change the likelihood approximation methods and numerical  
413 maximization methods. If convergence is still problematic, one might want to consider modifying models.  
414 For example, eliminating some random effects will likely make the algorithm converge. In particular,  
415 when the number of levels of a categorical variable is small, using fixed- rather than random- effects might  
416 help resolve the convergence issues. Using Bayesian alternatives might also be helpful. We recommend  
417 readers to check several relevant websites for further guidance:

418 <https://bbolker.github.io/mixedmodels-misc/glmmFAQ.html>

419 <https://m-clark.github.io/posts/2020-03-16-convergence/>

420 [https://rstudio-pubs-static.s3.amazonaws.com/33653\\_57fc7b8e5d484c909b615d8633c01d51.html](https://rstudio-pubs-static.s3.amazonaws.com/33653_57fc7b8e5d484c909b615d8633c01d51.html)

421

422 **A Bayesian Analysis of Example 4.** In the LME and GLMM framework, the random effect coefficients are  
423 assumed as being drawn from a given distribution. Therefore, Bayesian analysis provides a natural  
424 alternative for analyzing multilevel/ hierarchical data. Statistical inference in Bayesian analysis is from the  
425 posterior distribution of the parameters, which is proportional to the product of the likelihood of the data  
426 and the prior distribution of the parameters. Here we use the “[brms](#)” package to analyze the water lick  
427 data. The package performs Bayesian regression in multilevel models using the software “Stan” for full  
428 Bayesian (Bürkner, 2017; Bürkner, 2018). Due to the lack of prior information, we select priors that are  
429 relatively non-informative, i.e., have large variances around their mean. More specifically, we use a  
430 normal prior with mean 0 and large standard deviation 10 for the fixed-effect coefficients. For the  
431 variances of the random intercept and the errors, we assume a half-Cauchy distribution with a scale  
432 parameter of 5.

433

```
library(brms)#it might ask you to install other necessary packages
waterlick=read.table("waterlick_sim.txt", head=T)
obj.brms=brm(formula = lick ~ dff + (1|mouseID),
data=waterlick, family="bernoulli",
prior = c( set_prior("normal(0,10)", class="b"),
set_prior("cauchy(0,5)", class="sd")),
warmup=1000, iter=2000, chains=4,
control = list(adapt_delta = 0.95),
save_all_pars = TRUE)

> summary(obj.brms)
Family: bernoulli
Links: mu = logit
Formula: lick ~ dff + (1 | mouseID)
```

```

Data: waterlick (Number of observations: 512)
Samples: 4 chains, each with iter = 2000; warmup = 1000; thin = 1;
        total post-warmup samples = 4000

Group-Level Effects:
~mouseID (Number of levels: 8)
      Estimate Est.Error 1-95% CI u-95% CI Rhat Bulk_ESS Tail_ESS
sd(Intercept)    0.46    0.23    0.08    1.02 1.01    765    732

Population-Level Effects:
      Estimate Est.Error 1-95% CI u-95% CI Rhat Bulk_ESS Tail_ESS
Intercept    -0.63    0.23   -1.08   -0.14 1.01    1305    1803
dff           0.06    0.02    0.02    0.10 1.00    2780    2616

Samples were drawn using sampling(NUTS). For each parameter, Bulk_ESS
and Tail_ESS are effective sample size measures, and Rhat is the potential
scale reduction factor on split chains (at convergence, Rhat = 1).
> summary(obj.brms)$fixed
      Estimate Est.Error 1-95% CI u-95% CI Rhat Bulk_ESS Tail_ESS
Intercept -0.62627973 0.23101575 -1.08084815 -0.1373140 1.005906    1305    1803
dff        0.06105309 0.02058415  0.02182994  0.1026825 1.000328    2780    2616

```

434  
435 The results show that the odds that the mice will make a correct prediction increase by 6.2% (95% credible  
436 interval: 2.0%-10.6%) with 1% increase in dF/F. The use of a Bayesian approach and the Bayes factors  
437 have been advocated as an alternative to p-values since the Bayes factor represents a direct measure of  
438 the evidence of one model versus the other. Typically, it is recognized that a Bayes Factor greater than  
439 150 provides a very strong evidence of a hypothesis, say  $H_1$ , against another hypothesis, say  $H_0$ ; a Bayes  
440 Factor between 20 and 150 provides strong evidence of the plausibility of  $H_1$ , whereas if the Bayes Facto  
441 is between 3 and 20, it provides only positive evidence for  $H_1$ . A value of the Bayes Factor between 1 and  
442 3 is not worth more than a bare mention (Held and Ott, 2018; Kass and Raftery, 1995). In the following  
443 computation, we find that the Bayes factor of the model with dF/F versus the null model is 5.02,  
444 suggesting moderate association of dF/F with correct licks. These results are comparable to those from  
445 the frequentist GLMM in the previous paragraph.

```

446
#Note: to compute a Bayes factor, we need to use "save_all_pars=TRUE" option
#the reduced model is
obj0.brms=brm(formula = lick ~ 1+ (1|mouseID),
data=waterlick, family="bernoulli",
prior = c(
set_prior("cauchy(0,5)", class="sd")),
warmup=1000, iter=2000, chains=4,
control = list(adapt_delta = 0.95),
save_all_pars = TRUE)
> summary(obj0.brms)
Family: bernoulli
Links: mu = logit
Formula: lick ~ 1 + (1 | mouseID)
Data: waterlick (Number of observations: 512)
Samples: 4 chains, each with iter = 2000; warmup = 1000; thin = 1;
        total post-warmup samples = 4000

```

```

Group-Level Effects:
~mouseID (Number of levels: 8)
      Estimate Est.Error 1-95% CI u-95% CI Rhat Bulk_ESS Tail_ESS
sd(Intercept)    0.65    0.28    0.28    1.37 1.00    745    849

Population-Level Effects:
      Estimate Est.Error 1-95% CI u-95% CI Rhat Bulk_ESS Tail_ESS
Intercept    -0.34    0.26   -0.85    0.17 1.00    831    1017

Samples were drawn using sampling(NUTS). For each parameter, Bulk_ESS
and Tail_ESS are effective sample size measures, and Rhat is the potential
scale reduction factor on split chains (at convergence, Rhat = 1).

#compare the two models by computing the Bayes factor: the one with dff vs the null
> bayes_factor(obj.brms, obj0.brms)
Iteration: 1
Iteration: 2
Iteration: 3
Iteration: 4
Iteration: 5
Iteration: 6
Iteration: 1
Iteration: 2
Iteration: 3
Iteration: 4
Iteration: 5
Estimated Bayes factor in favor of obj.brms over obj0.brms: 0.19960
#compare the models by computing the Bayes factor: the null vs the one with dff
#note that this Bayes factor is the reciprocal of the previous one
> bayes_factor(obj0.brms, obj.brms)
Iteration: 1
Iteration: 2
Iteration: 3
Iteration: 4
Iteration: 5
Iteration: 6
Iteration: 1
Iteration: 2
Iteration: 3
Iteration: 4
Iteration: 5
Estimated Bayes factor in favor of obj0.brms over obj.brms: 5.01865

```

448 **Supplemental Appendix 0**

```

library(MASS) #for function mvrnorm
library(nlme) #for function lme

set.seed(123)
B=1000
#change B to 10000 will produce more an accurate estimate of the Type I error rate
p.lm.null=matrix(0, B, 5)
p.lme.null=matrix(0, B, 5)
for(b in 1:B) #B simulations
{
  y=NULL
  i=1; ncells=c(53, 49, 56, 52, 46, 47, 54)
  for(j in 1:length(ncells)){
    mysigma=diag(ncells[j])+
matrix(icc.analysis[i,]$icc,ncells[j],1)**matrix(icc.analysis[i,]$icc, 1,
ncells[j])
    y=c(y, mvrnorm(n = 1, mu=rep(0,ncells[j]), Sigma=mysigma) ) }

  i=2; ncells=c(52, 54, 54, 47, 53, 49)
  for(j in 1:length(ncells)){
    mysigma=diag(ncells[j])+
matrix(icc.analysis[i,]$icc,ncells[j],1)**matrix(icc.analysis[i,]$icc, 1,
ncells[j])
    y=c(y, mvrnorm(n = 1, mu=rep(0,ncells[j]), Sigma=mysigma) ) }

  i=3; ncells=c(47, 48, 44)
  for(j in 1:length(ncells)){
    mysigma=diag(ncells[j])+
matrix(icc.analysis[i,]$icc,ncells[j],1)**matrix(icc.analysis[i,]$icc, 1,
ncells[j])
    y=c(y, mvrnorm(n = 1, mu=rep(0,ncells[j]), Sigma=mysigma) ) }

  i=4; ncells=c(50, 45, 55)
  for(j in 1:length(ncells)){
    mysigma=diag(ncells[j])+
matrix(icc.analysis[i,]$icc,ncells[j],1)**matrix(icc.analysis[i,]$icc, 1,
ncells[j])
    y=c(y, mvrnorm(n = 1, mu=rep(0,ncells[j]), Sigma=mysigma) ) }

  i=5; ncells=c(47, 57, 47, 52, 42)
  for(j in 1:length(ncells)){
    mysigma=diag(ncells[j])+
matrix(icc.analysis[i,]$icc,ncells[j],1)**matrix(icc.analysis[i,]$icc, 1,
ncells[j])
    y=c(y, mvrnorm(n = 1, mu=rep(0,ncells[j]), Sigma=mysigma) ) }

  #treatment id: Ex1[,2]
  #mouse id: Ex1[,3]
  Ex1.sim=data.frame(res=y, treatment_idx=Ex1$treatment_idx, midx=Ex1$midx)
  obj.lme=lme(res~treatment_idx, data= Ex1.sim, random = ~ 1|midx, method="ML")
  p.lme.null[b, 1]=anova(obj.lme) [2,4]
  p.lme.null[b, 2:5]=coef(summary(obj.lme)) [-1,5]

  obj.lm=lm(res~treatment_idx, data=Ex1.sim)
  p.lm.null[b, 1]=anova(obj.lm) [1,5]
  p.lm.null[b, 2:5]=coef(summary(obj.lm)) [-1,4]
}

#colMeans(p.lm.null[,1]<0.05)
#colMeans(p.lme.null[,1]<0.05)

```

```

#There are five p-values for each method; the first p-value is the overall
#significance for any difference among the groups
#for i=2, ...5, the ith p-value is for the comparison between group 5 and the
#reference group (i.e., group 1)

print("Type I error rate of LM at significance level 0.05: ")
print(mean(p.lm.null[,1]<0.05))

print("Type I error rate of LME at significance level 0.05: ")
print(mean(p.lme.null[,1]<0.05))

par(mfrow=c(1,2))
h=hist(p.lm.null[,1], nclass=20, plot=F)
h$density = h$counts/sum(h$counts)*100
plot(h,freq=FALSE, xlab="", ylab="Proportion (%)", main="histogram of LM p-values",
ylim=c(0,100), xlim=c(0,1))
#abline(h=5, col=2)

h=hist(p.lme.null[,1], nclass=20, plot=F)
h$density = h$counts/sum(h$counts)*100
plot(h,freq=FALSE, xlab="", ylab="Proportion (%)", main="histogram of LME p-values",
ylim=c(0,100), xlim=c(0,1))
#abline(h=5, col=2)

```

449

450

## 451 **References:**

452 Bates, D., Mächler, M., Bolker, B., and Walker, S. (2014). Fitting linear mixed-effects models using lme4.

453 arXiv preprint arXiv:14065823.

454 Bürkner, P.-C. (2017). brms: An R package for Bayesian multilevel models using Stan. *Journal of*  
455 *statistical software* *80*, 1-28.

456 Bürkner, P. (2018). Advanced Bayesian Multilevel Modeling with the R Package brms. *The R Journal*, *10*  
457 *(1)*, 395.

458 Fitzmaurice, G.M., Laird, N.M., and Ware, J.H. (2012). *Applied longitudinal analysis*, Vol 998 (John Wiley  
459 & Sons).

460 Fox, J., and Weisberg, S. (2018). *An R companion to applied regression* (Sage publications).

461 Halekoh, U., and Højsgaard, S. (2014). A kenward-roger approximation and parametric bootstrap  
462 methods for tests in linear mixed models—the R package pbkrtest. *Journal of Statistical Software*  
463 *59*, 1-30.

464 Held, L., and Ott, M. (2018). On p-Values and Bayes Factors. *Annual Review of Statistics and Its*  
465 *Application*, Vol 5: 5, 393-419.

466 Henderson, C.R., Kempthorne, O., Searle, S.R., and Von Krosigk, C. (1959). The estimation of  
467 environmental and genetic trends from records subject to culling. *Biometrics* *15*, 192-218.

468 Kass, R.E., and Raftery, A.E. (1995). Bayes factors. *Journal of the american statistical association* *90*, 773-  
469 795.

470 Kuznetsova, A., Brockhoff, P.B., and Christensen, R.H.B. (2017). lmerTest Package: Tests in Linear Mixed  
471 Effects Models. *Journal of Statistical Software* *82*, 1-26.

472 Lenth, R., Singmann, H., Love, J., Buerkner, P., and Herve, M. (2019). Estimated marginal means, aka  
473 least-squares means. R package version 1.3. 2.

474 Lüdtke, D. (2018). sjPlot: Data visualization for statistics in social science. R package version 2.

475 Pinheiro, J., and Bates, D. (2006). *Mixed-effects models in S and S-PLUS* (Springer Science & Business  
476 Media).

477 Pinheiro, J., Bates, D., DebRoy, S., Sarkar, D., and Team, R.C. (2007). Linear and nonlinear mixed effects  
478 models. R package version 3, 1-89.  
479 R Development Core Team (2020). R: A language and environment for statistical computing (Vienna,  
480 Austria: R Foundation for Statistical Computing).  
481 Wolak, M., and Wolak, M.M. (2015). Package 'ICC'. Facilitating estimation of the Intraclass Correlation  
482 Coefficient. Version 2.3.0.  
483  
484
